# Supplementary material
Source: MDPI journal article supplement (https://www.mdpi.com/2673-4591/6/1/11)
Supplement: s1 [file s1]

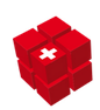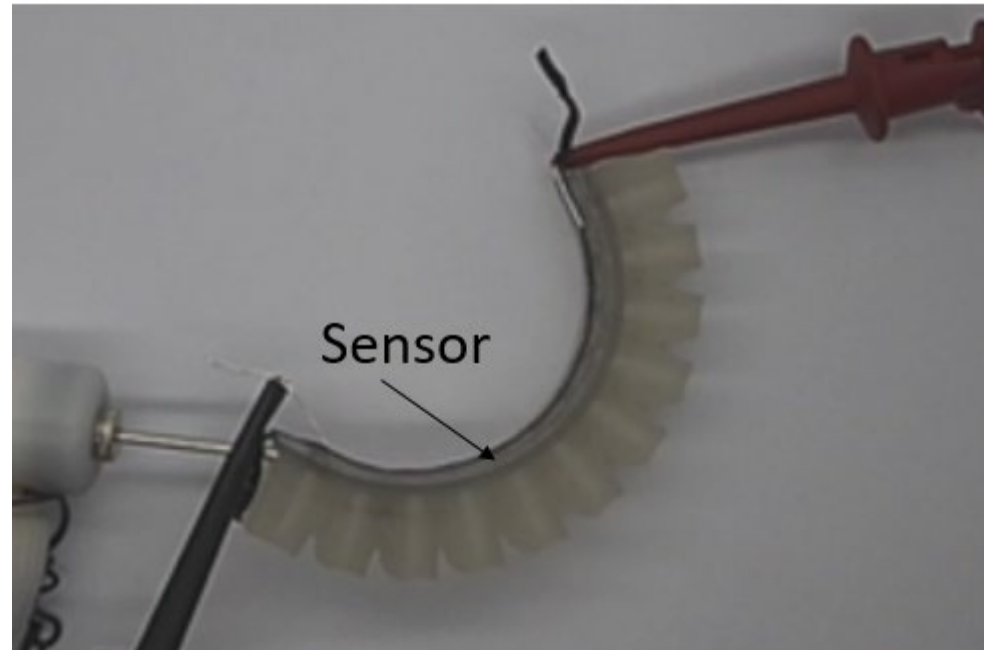

# A soft pneumatic actuator with integrated deformation sensing elements produced exclusively with extrusion based additive manufacturing

EMPA Swiss Federal Laboratories for Materials Science and Technology

Department of Functional Materials

Antonia Georgopoulou, Lukas Egloff, Bram Vanderborcht Frank Clemens

antonia.georgopoulou@empa.ch

A soft pneumatic actuator with integrated deformation sensing elements produced exclusively with extrusion based additive manufacturing

The most common method for fabrication of soft robots is casting:

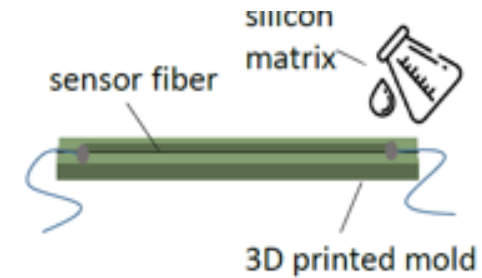

However, there it can be time consuming especially when integration of soft sensors is involved.

Additive Manufacturing is a interesting alternative to molding because it allows the integration of sensors in situ.

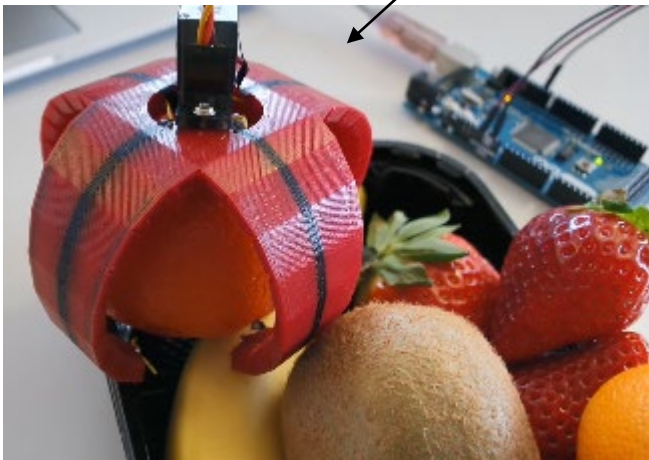

Conventional filament based fused deposition modeling (**FDM**) is not compatible with thermoplastic elastomers of low shore hardness, required for pneumatic actuators.

## Pellet-Based Fused Deposition Modeling(FDM)

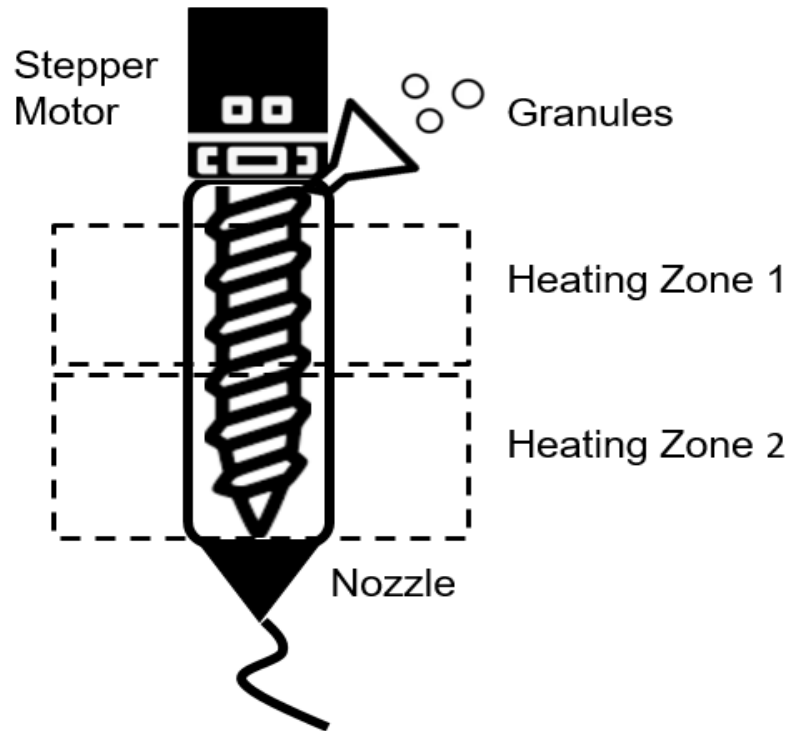

- Allows to print thermoplastic elastomers of low shore hardness.
- Allows to print composites with large filler concentration.
- Compatible with multi-material printing. Allows to integrate functional elements like sensors in-situ.

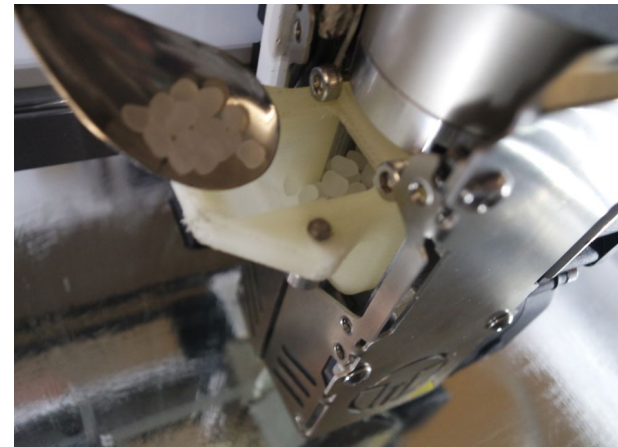

## Choosing the matrix material for the conductive composite

For the sensor, carbon black in mixed with a TPS thermoplastic elastomer in 1:1 mass ratio.

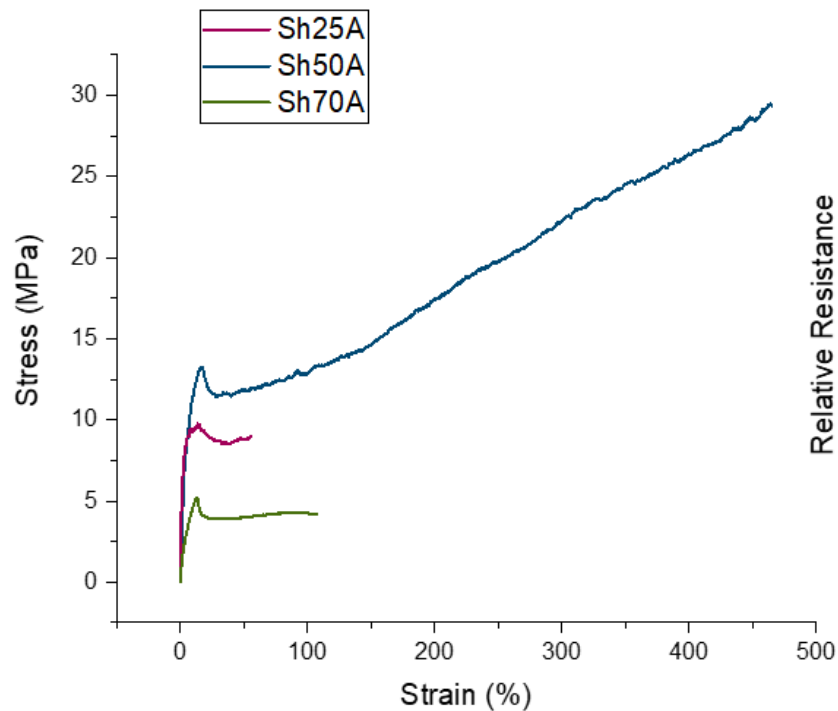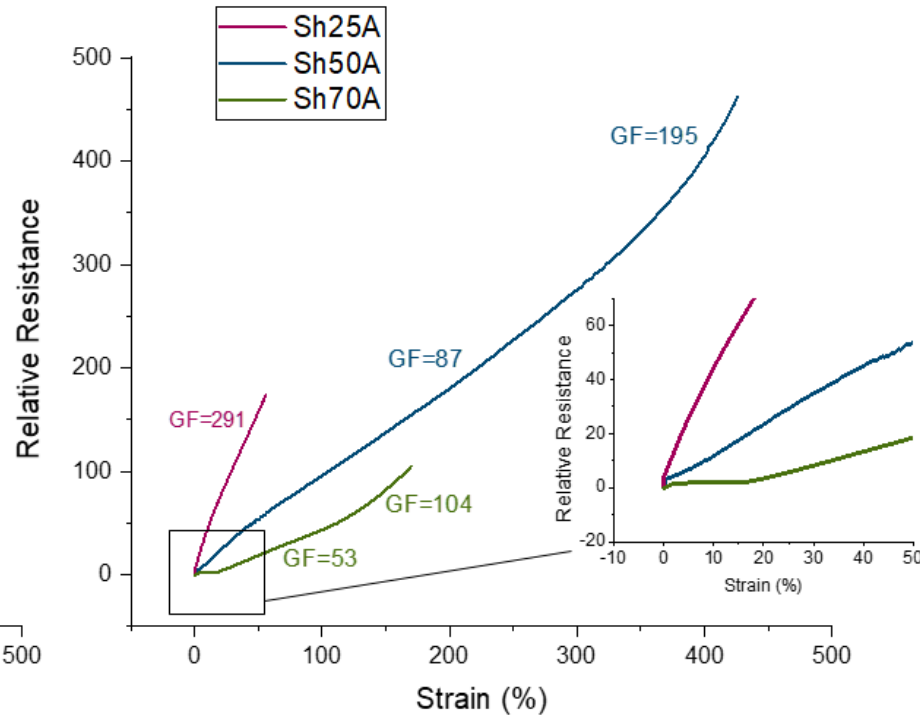

Composite of lowest shore hardness became brittle after mixing

Sh50A

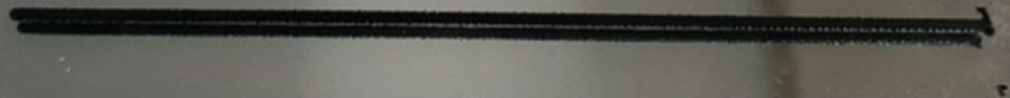

Sh70A

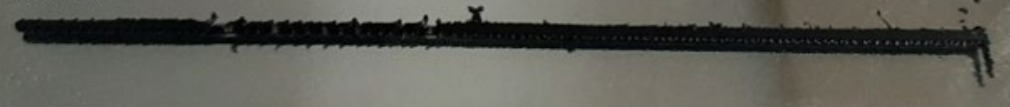

The composite with the higher shore hardness could not produce a continuous line during printing.

## Tensile Testing up to the Point of Fracture

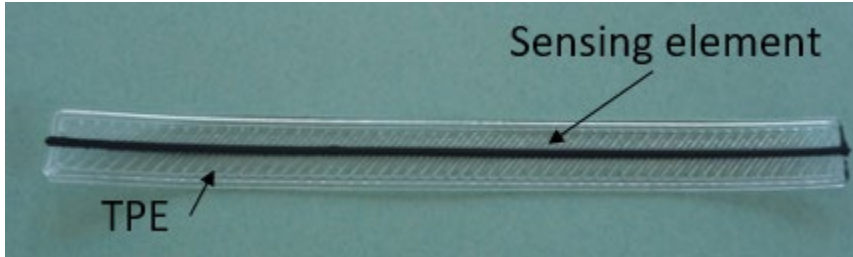

The Sh50A composite was printed on Sh18A TPS.

$$R_{\text{rel}} = \frac{R - R_0}{R_0}$$

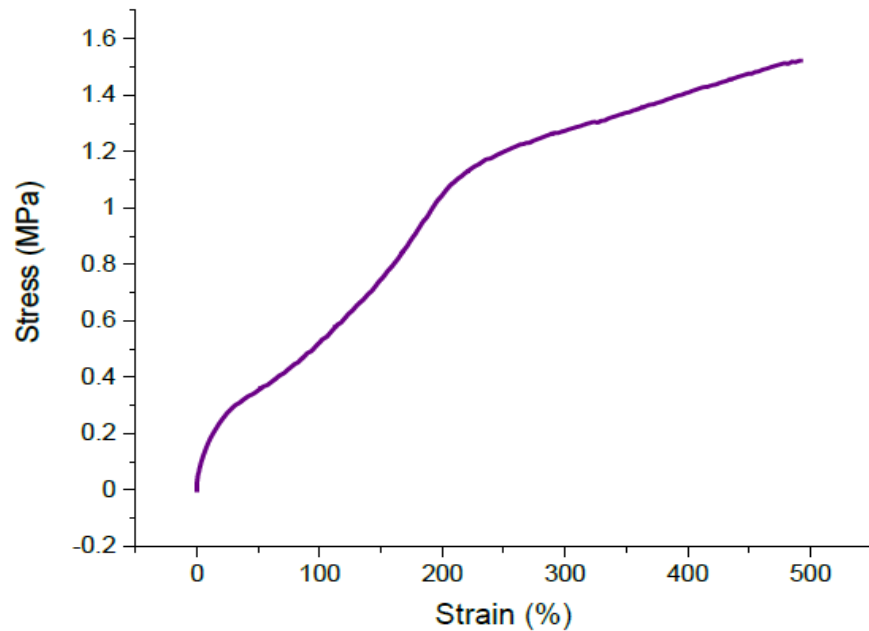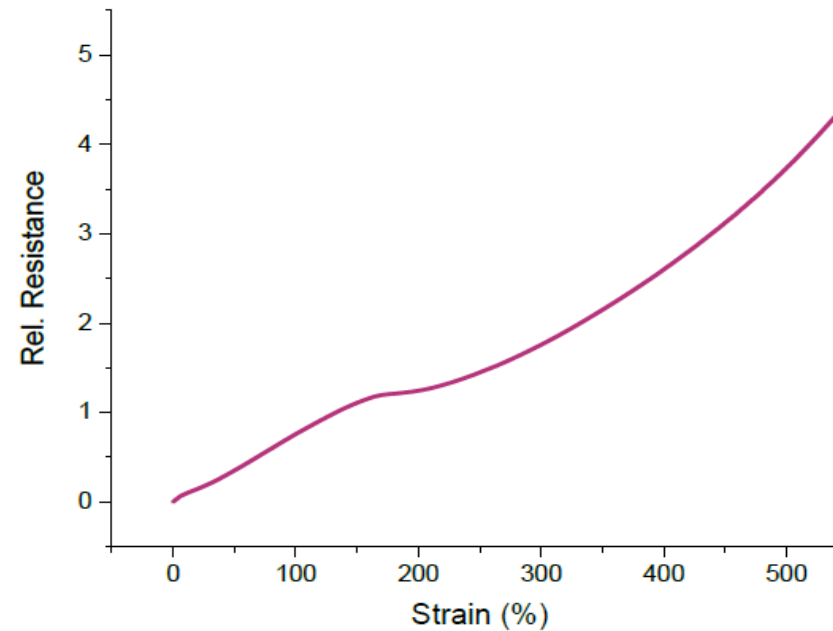

Monotonic  
response  
below 200%  
strain.

$$R_{rel} = \frac{R - R_0}{R_0}$$

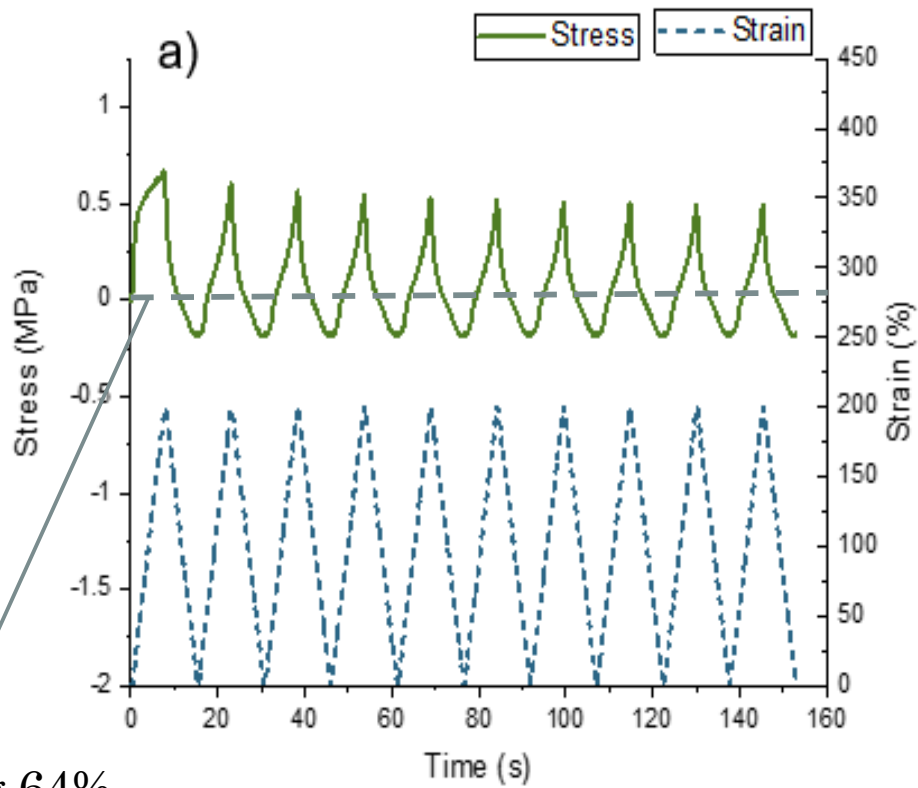

Buckling 64%

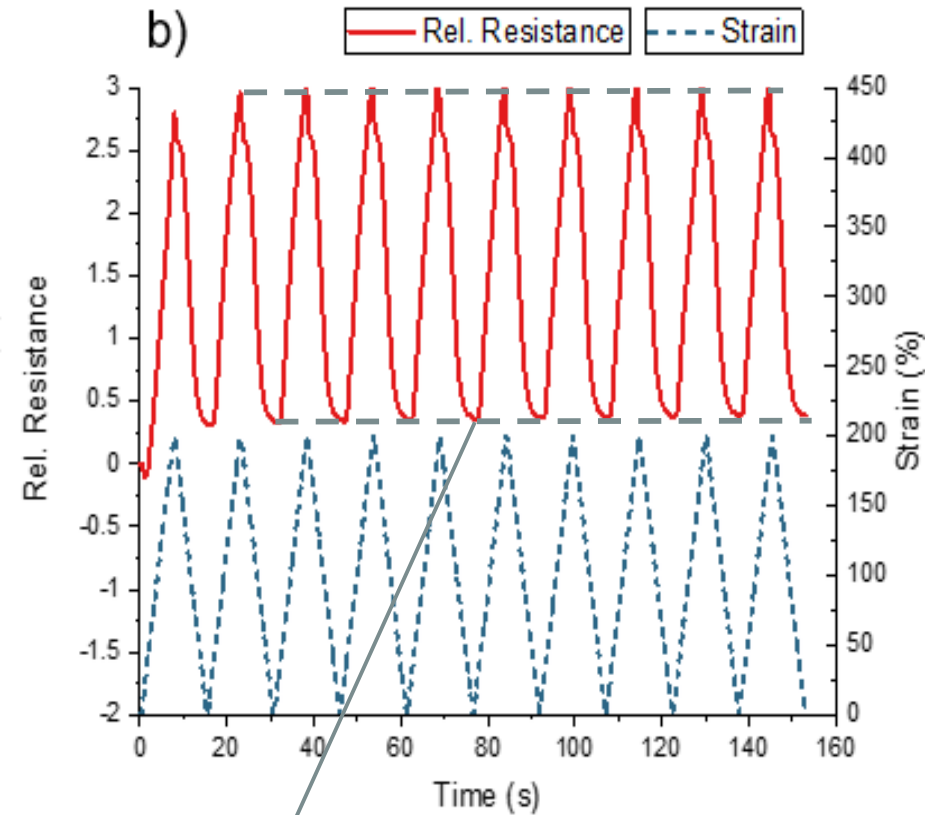

Drift 1%

GF=6

$$GF = \frac{R_{rel}}{\Delta \epsilon}$$

## Quasi-Static Testing

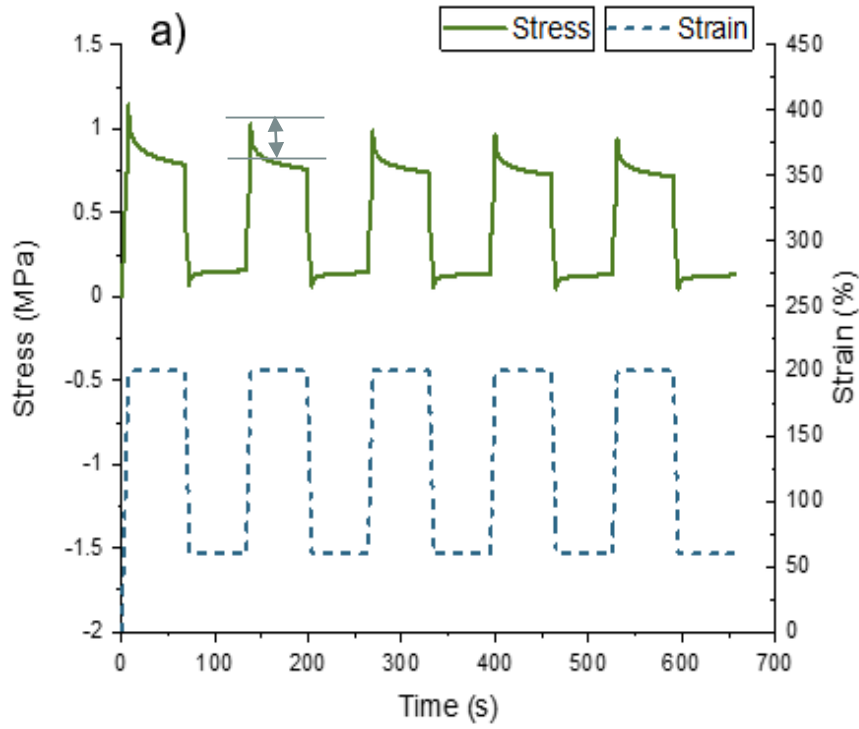

Mechanical Relaxation: 29%

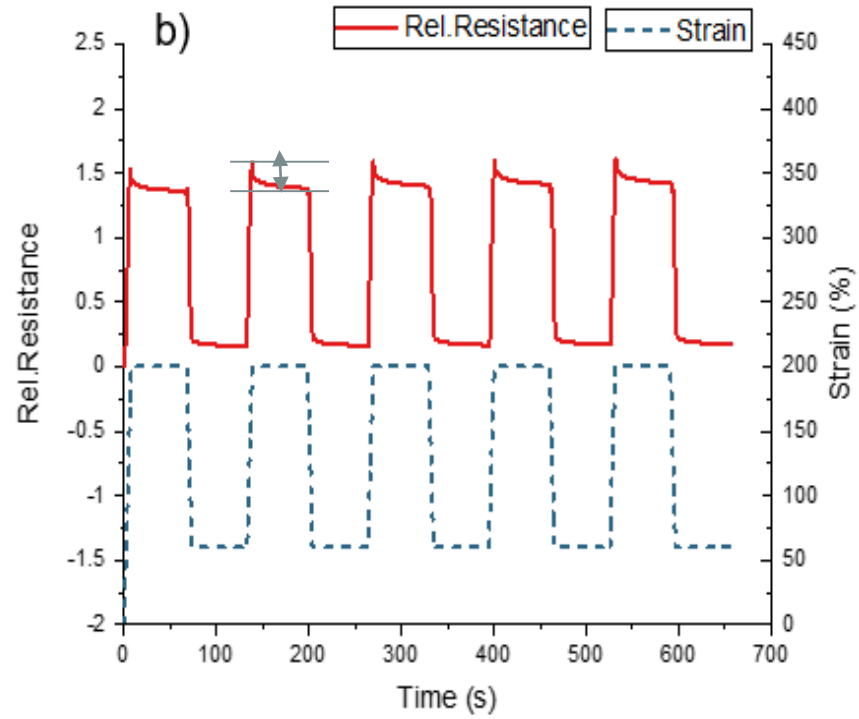

Signal Relaxation: 32%

$$R_{\text{rel}} = \frac{R - R_0}{R_0}$$

## Pneumatic Bending Actuator

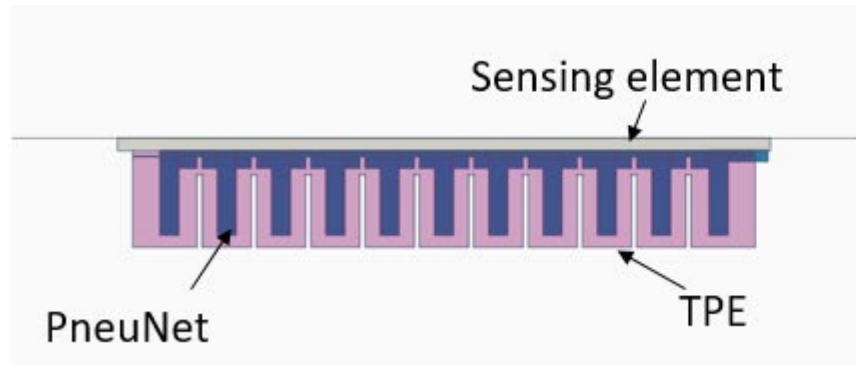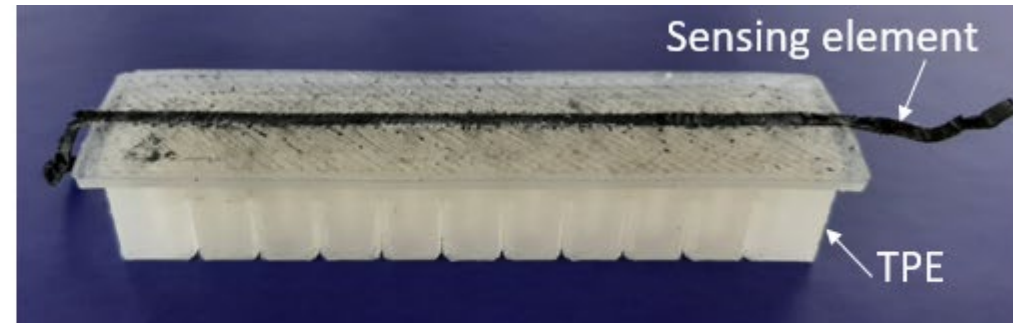

- The pneumatic actuator was produced in one step process.
- The total fabrication time was 3 hours.
- The sensing element was integrated in Situ.
- The resulting actuator was air-tight.



## Pneumatic Bending Actuator: Bending angle

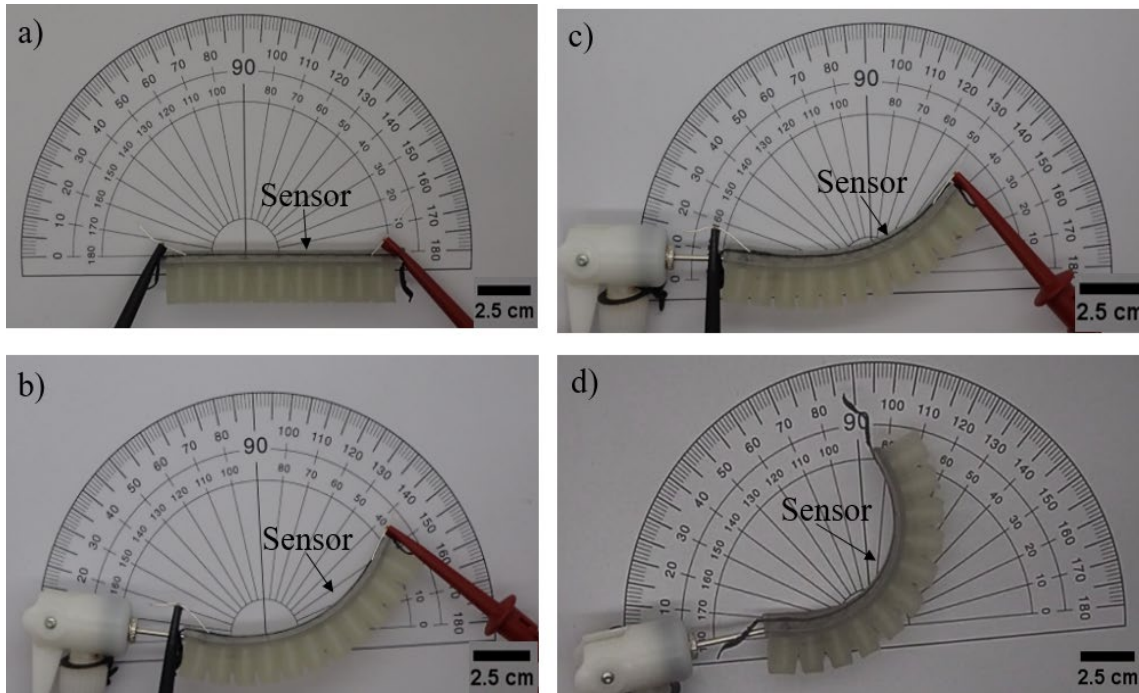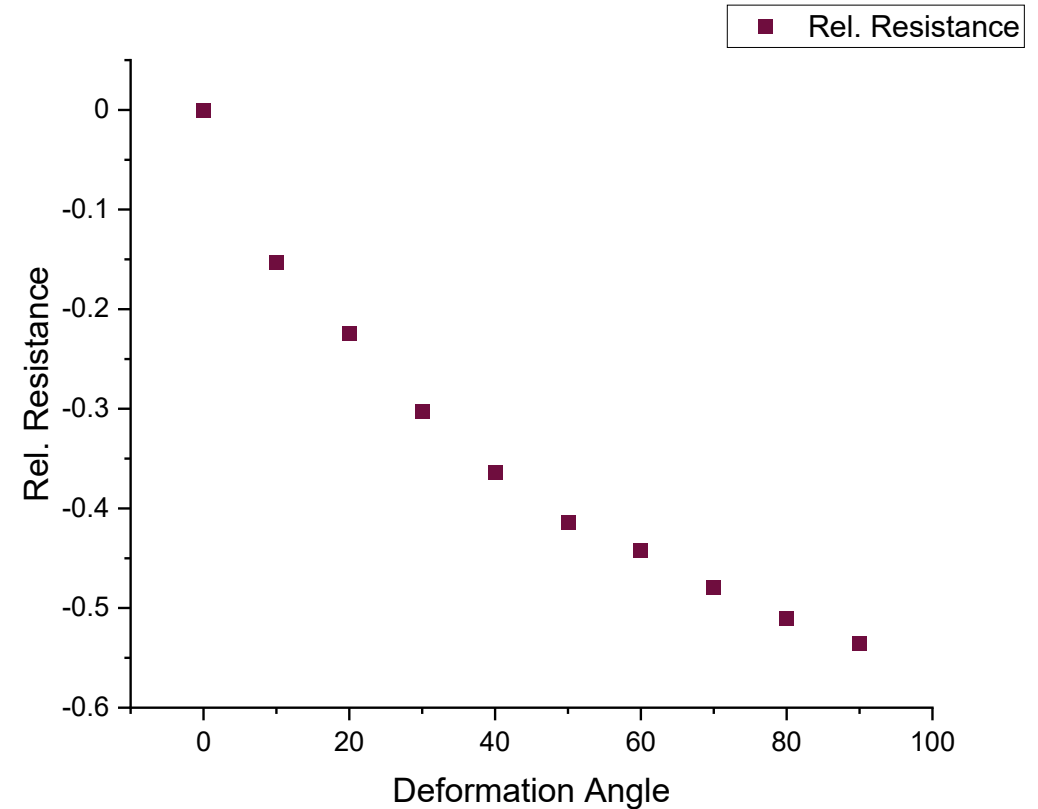

Every value of the resistance correlated with a distinctive bending angle.

Reverse piezoresistivity was expected because the sensor was under compression.

## Pneumatic Bending Actuator: Quasi-Static Test

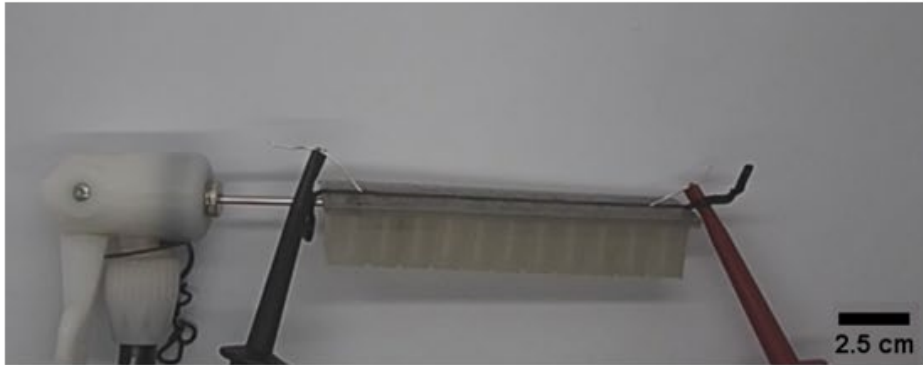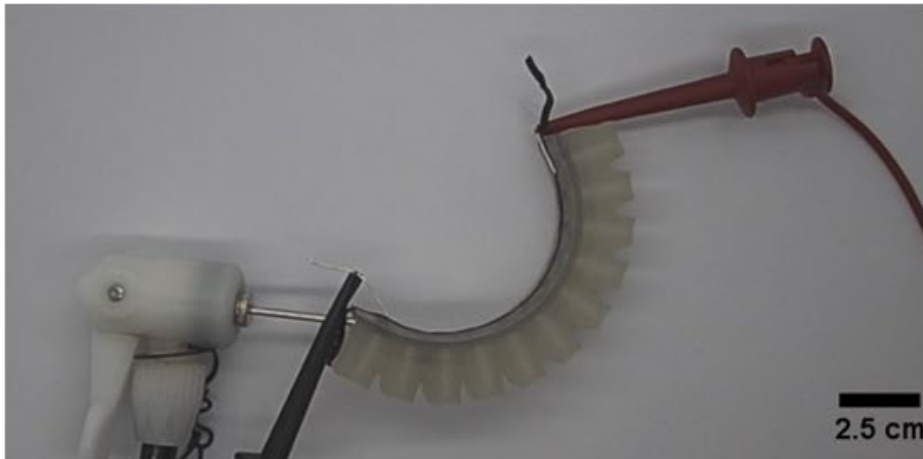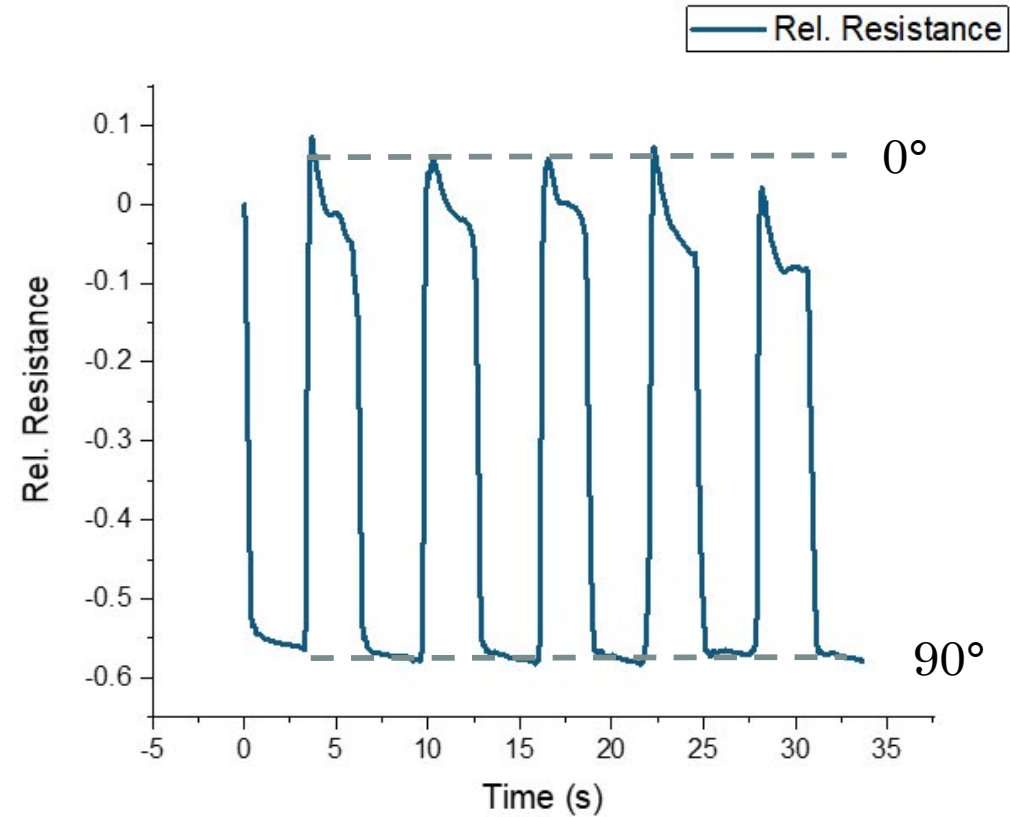

Despite the relaxation, it was possible to distinguish between position  $0^\circ$  and  $90^\circ$ .

## Conclusions

- The Sh50A composite combined good printability with a large functional range.
- Sensor strips printed with the Sh50A showed a reproducible response with very low drift 1%.
- There was significant relaxation for the stress and the sensor signal.
- The sensor was integrated in the bending actuator and it was used to monitor the bending angle of the actuator.
- The sensor integrated in the actuator showed a monotonic response and reverse piezoresistivity because the sensor was under compression.

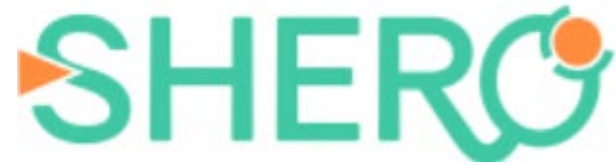

## Self-Healing Soft Robotics

A Horizon 2020 FET Open Project (Grant Agreement ID: 828818).

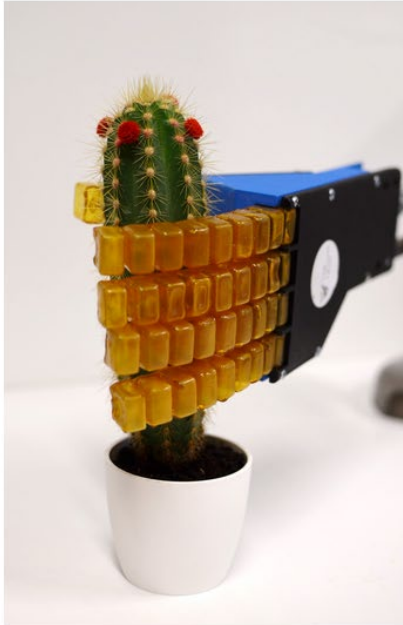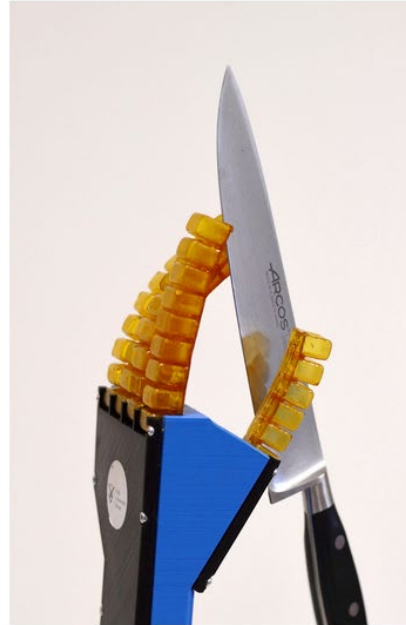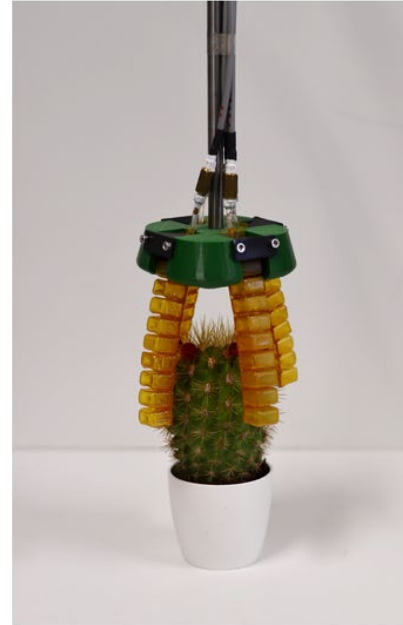

<http://www.sherofet.eu/>

Contact info:

Empa- Department of Functional Materials

[antonia.georgopoulou@empa.ch](mailto:antonia.georgopoulou@empa.ch)
